# Supplementary material
Source: PubMed Central journal article supplement (PMC6314847)
Supplement: NIHMS1001510-supplement-Supporting_Information_1.pdf [file NIHMS1001510-supplement-Supporting_Information_1.pdf]

1 **Distributive O-GlcNAcylation on the Highly Repetitive C-terminal Domain of**  
2 **RNA Polymerase II**

3

4 *Lei Lu†, Dacheng Fan†, Chia-Wei Hu†, Matthew Worth‡, Zhi-Xiong Ma†, Jiaoyang Jiang†\**

5 †Pharmaceutical Sciences Division, School of Pharmacy, and ‡Department of Chemistry,

6 University of Wisconsin-Madison, Madison, Wisconsin 53705

7

8

9

10

11

12

**Supporting Information**

13

1     **Construction of Plasmids.** CTD constructs: The DNA sequence of CTD52 was synthesized  
2 with codon optimization for *E. coli* expression. The synthetic DNA fragment was amplified by  
3 PCR followed by restriction enzyme digestion with BsaI and HindIII. The digested CTD52  
4 fragment was ligated into pE-SUMOstar vector (LifeSensors) that was digested with the same  
5 restriction enzymes. The final His-SUMO-CTD52 plasmid has an N-terminal His<sub>6</sub>-tag and  
6 SUMO tag, following by CTD52 sequence. Plasmids of His-SUMO-CTD7, 10, 15 and 20 were  
7 similarly cloned into pE-SUMOstar vector between BsaI and HindIII sites. Below is the DNA  
8 sequence of synthesized CTD52:

9     AGGTTACTCCCCGACCAGCCCTGCGTACGAGCCGCGTTCTCCGGGTGGCTATACCC  
10  CACAATCTCCGTCGTATTCCCCGACTTCTCCGTCCTACAGCCCTACTAGCCCATCGTA  
11  CAGCCCAACGAGCCCGAACACTACAGCCCGACTTCCCCGAGCTATAGCCCAACTAGTC  
12  CGTCGTA TCCCCTACGAGCCCTAGCTACTCCCCTACCTCCCCGTCGTACAGCCCAA  
13  CGAGCCCTTCCTATTCCCCGACGAGCCCAAGCTACTCTCCTACCTCGCCTTCCTATAG  
14  CCCGACGTCCCCAAGCTACAGCCCGACGAGCCCTAGCTACTCGCCGACCAGCCCGA  
15  GCTACTCCCCAACCTCCCCTAGCTACAGCCCGACCAGCCCGTCTTATTCCCCGACCT  
16  CTCCGTCTTACAGCCCTACTTCCCCGTCTTACTCTCCAACGTCCCCGAGCTACAGCCC  
17  GACTAGCCCAAATTACAGCCCAACCAGCCCGAATTACACGCCGACCAGCCCGAGCT  
18  ATAGCCCTACCAGCCCATCTTACAGCCCAACCTCCCCAAATTACACCCCAACGTCTC  
19  CGAATTACTCTCCAACCTCTCCGAGCTATTGCCTACCAGCCCGTCCTACTCCCCGAC  
20  CTCGCCGAGCTACTCGCCGAGCTCCCCGCGTTACACGCCGCAGAGCCCGACCTACAC  
21  CCCGTCCTCGCCGTCGTA TCTCCGTCTAGCCCGTCGTATAGCCCTGCGAGCCCTAA  
22  GTACACGCCTACGAGCCCGTCTTATAGCCCGTCTAGCCCGAATATAACCCTACCAG  
23  CCCAAAGTACTCCCCAACCTCCCCGAAATACAGCCCGACGAGCCCGAAATACAGCC

1 CAACGAGCCCCGACCTATTCTCCGACGACCCCGAAATACAGCCCCGACGAGCCCCGACT  
2 TATTCCCCTACTTCTCCGGTGTACACCCCTACGAGCCCCGAAGTATAGCCCCGACGAGC  
3 CCGACCTACTCTCCGACCAGCCCCAAAGTACAGCCCCGACGAGCCCCAACGTACAGCCC  
4 TACCTCTCCTAAAGGCAGCACGTATTCTCCGACCTCGCCTGGTTATTCCCCAACTAG  
5 CCCAACCTACAGCCTGACGAGCCCCGGCTATCAGCCCCGGATGACAGCGATGAAGAAA  
6 ACTAA

7 OGT constructs: The ncOGT (full-length human OGT), OGT<sub>6,5</sub> (spanning residues 245-  
8 1031 based on the numbering of the full-length protein), OGT<sub>5,5</sub> (spanning residues 279-1031),  
9 and OGT<sub>4,5</sub> (spanning residues 313-1031) constructs were kindly provided by the Suzanne  
10 Walker lab at Harvard Medical School. All of these OGT plasmids were cloned into pET24b  
11 vector with OGT protein fused to an N-terminal T7 tag, followed by a His<sub>8</sub>-tag and an HRV3C  
12 protease cleavage site (LEVLFQGP). The ncOGT and OGT<sub>4,5</sub> constructs were reported  
13 previously.<sup>1</sup>

14 CTD52 and ncOGT co-expression construct: CTD52 sequence was amplified by PCR and  
15 ligated into pETDuet-1 vector (Novagen) between restriction sites of NcoI and NotI in MCS1  
16 region to generate plasmid pETDuet-CTD52. This plasmid and the PCR amplified ncOGT  
17 sequence were both digested with restriction enzymes of NdeI and XhoI, and then the digested  
18 ncOGT fragment was ligated into the MCS2 region of pETDuet-CTD52 to generate final  
19 plasmid of pETDuet-CTD52-ncOGT.

20 OGA construct: cDNA of human OGA (isoform 1, Uniprot identifier #O60502-1) was  
21 amplified by PCR and cloned into pET21b vector between SalI and XhoI sites. The resulting  
22 OGA protein contains a C-terminal His<sub>6</sub>-tag.

1           **Expression and Purification of Proteins.** OGTs: The plasmid of each OGT construct  
2 (ncOGT, OGT<sub>6,5</sub>, OGT<sub>5,5</sub>, and OGT<sub>4,5</sub>) was transformed into BL21(DE3) competent cells. OGT  
3 proteins were expressed and purified as previously reported.<sup>1</sup>

4           CTDs: Each His-SUMO-CTD plasmid (CTD7, 10, 15, 20, and 52) was transformed into  
5 BL21(DE3)CodonPlusRIL competent cells. CTD proteins were expressed and purified similarly  
6 as OGT.

7           O-GlcNAcylated CTD52: The plasmid of pETDuet-CTD52-ncOGT was transformed into  
8 BL21(DE3)CodonPlusRIL competent cells for co-expression of ncOGT (without His-tag) and  
9 His-SUMO-CTD52. The purification of O-GlcNAcylated His-SUMO-CTD52 protein was  
10 conducted similarly as OGT.

11           OGA: The plasmid of OGA was transformed into BL21(DE3) competent cells. Protein  
12 purification was conducted similarly as OGT.

13

14

## 15   **REFERENCES**

16           (1) Lazarus, M. B., Nam, Y., Jiang, J., Sliz, P., and Walker, S. (2011) Structure of human O-  
17 GlcNAc transferase and its complex with a peptide substrate. *Nature* 469, 564–567.

18

19

1 **Figure S1**

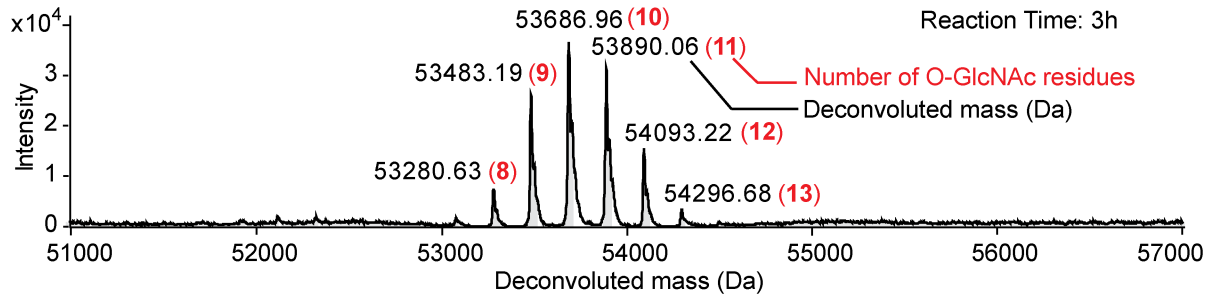

3 **Figure S1.** Intact protein MS of O-GlcNAcylated SUMO-CTD52 at a higher molar ratio. This  
4 experiment was conducted for 3 h with an increased ratio of protein concentration (SUMO-  
5 CTD52:OGT = 10:1). The numbers of O-GlcNAc residues are highlighted in red and bold.

6

1 **Figure S2**

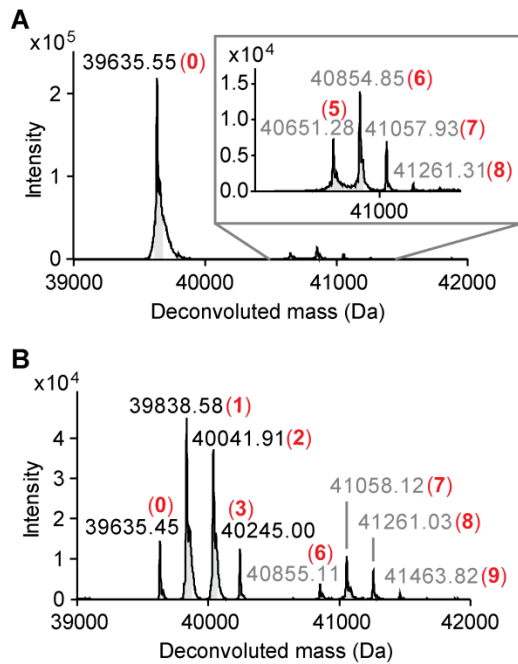

2

3 **Figure S2.** Deconvoluted mass spectra from distraction assay. (A) CTD52 (without tag) was  
4 partially glycosylated for 1 h (deconvoluted masses are enlarged in the insert and shown in gray)  
5 when the second batch of unmodified CTD52 (deconvoluted mass is shown in black) was added.  
6 Reaction was immediately stopped without further incubation. (B) Deconvoluted mass spectrum  
7 of the same reaction following addition of the second batch of CTD52 and incubation for another  
8 15 min (same labeling as above). The numbers of O-GlcNAc residues are highlighted in red and  
9 bold.

10

1 **Figure S3**

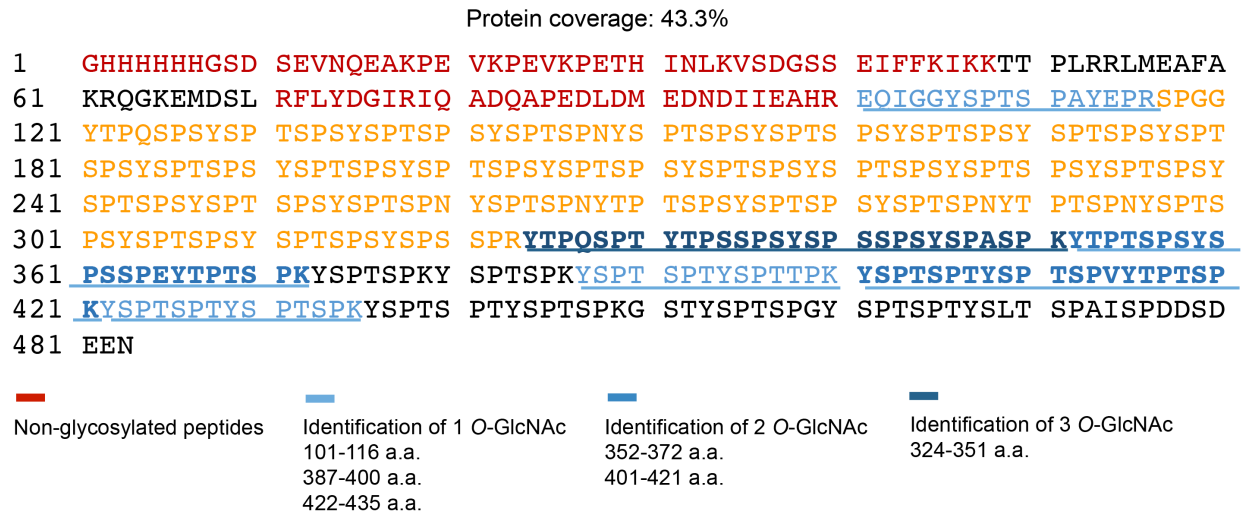

2

3 **Figure S3.** Sequence coverage and detected peptides from in-gel trypsin digestion of  
4 glycosylated SUMO-CTD52 after 60 min incubation with ncOGT and UDP-GlcNAc. Non-  
5 glycosylated, singly, doubly, and triply glycosylated peptides are highlighted in red, light blue,  
6 medium blue, and dark blue, respectively. The peptide in yellow was detected from in-solution  
7 trypsin digestion followed by intact protein MS, and the O-GlcNAcylation level was summarized  
8 in Figure 5.

9

1 **Figure S4**

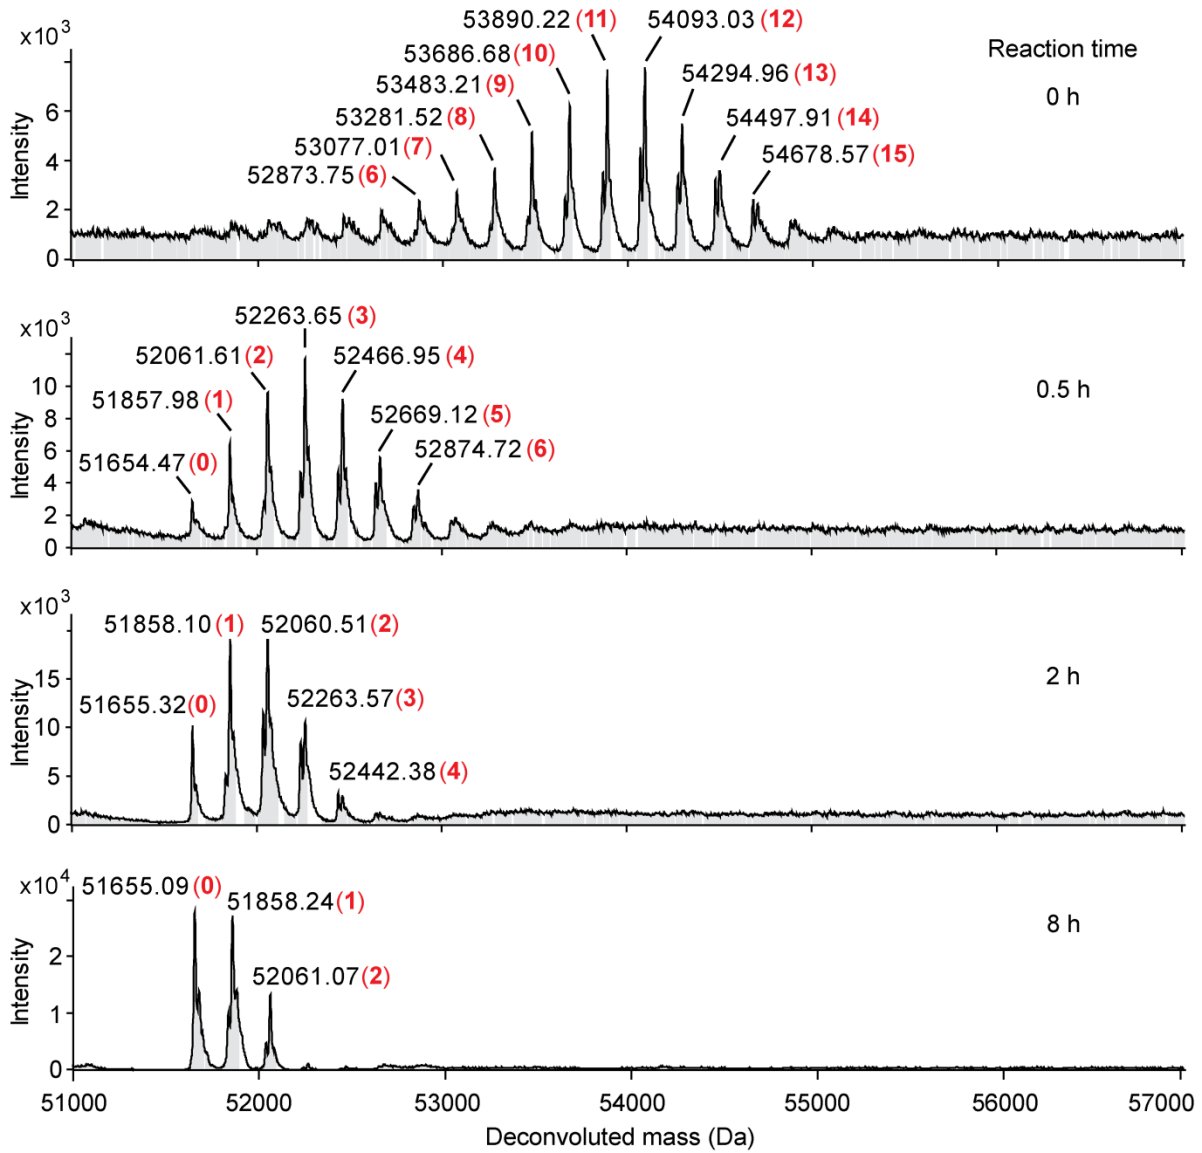

2

3 **Figure S4.** Intact protein MS showing that OGA almost completely removed O-GlcNAc from  
4 glycosylated CTD. An increased molar ratio of OGA to O-GlcNAcylated SUMO-CTD52 of 1:4  
5 was applied. The numbers of O-GlcNAc residues are highlighted in red and bold.

6
